# Supplementary material for: Improving the bioaccessibility and bioavailability of carnosic acid using a lecithin-based nanoemulsion: complementary in vitro and in vivo studies
Source: Royal Society of Chemistry journal article supplement (doi:10.1039/d0fo01098g), 2020-01-01

## Supplementary information

**Figure.** Calibration curve of the plasma CA concentration versus HPLC obtained ratio of Area of Gemfibrozil to CA

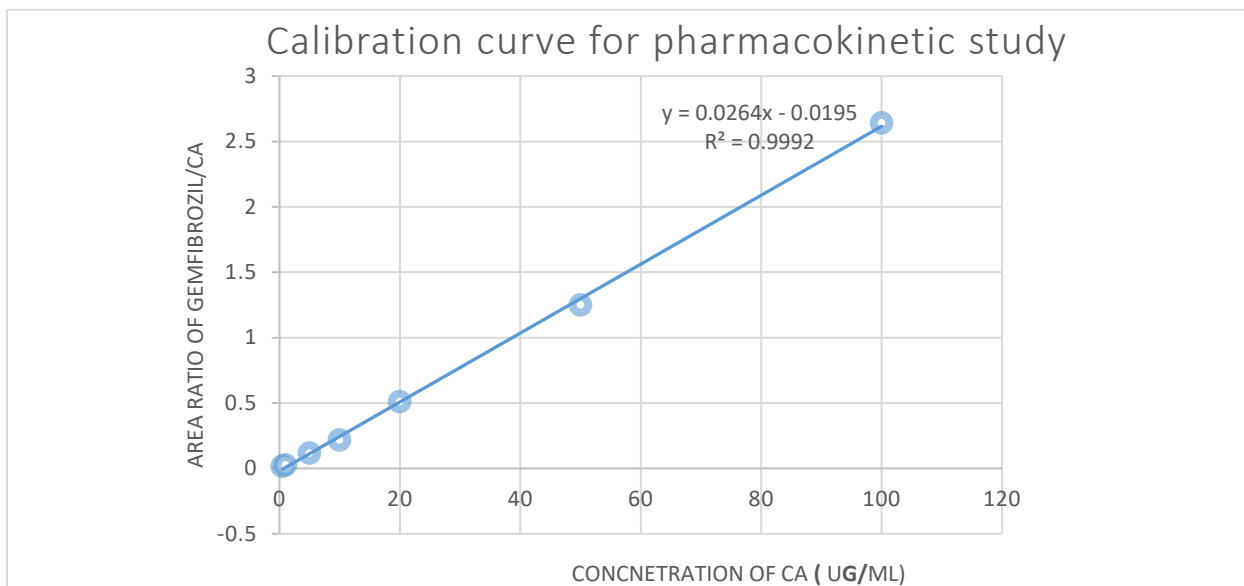

Supplement: d0fo01098g1.pdf [file d0fo01098g1.pdf]
